# Supplementary material
Source: PubMed Central journal article supplement (PMC2824395)
Supplement: 0910782107_pnas.200910782SI.pdf [file 0910782107_pnas.200910782SI.pdf]

# Supporting Information

Abrami et al. 10.1073/pnas.0910782107

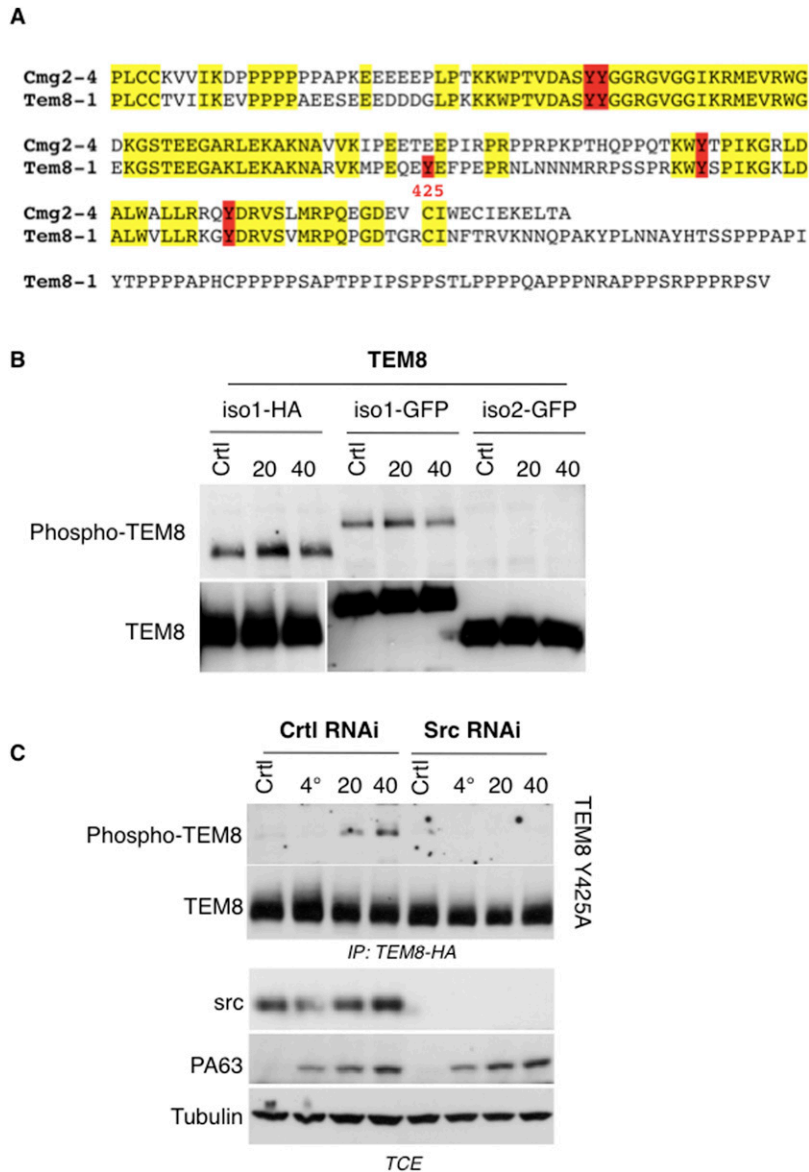

**Fig. S1.** (A) Alignment of CMG2 isoform 4 and TEM8 isoform 1. Red background represents tyrosine residues (Y) and yellow background conserved residues. (B) HeLa cells were transfected for 48 h with TEM8-1 tagged with HA or fused to GFP or with TEM8-2 fused to GFP. Cells were treated or not with 1  $\mu$ g/ml of PA63 for 1 h at 4  $^{\circ}$ C followed by 20 and 40 min at 37  $^{\circ}$ C. Immunoprecipitates against HA or GFP were analyzed by SDS/PAGE and Western blotting against phospho-tyrosine proteins. (C) HeLa cells were transfected for 48 h with HA-tagged TEM8-1 Y425A, as well as with RNAi duplexes against an irrelevant protein (G protein of VSV) or *src*. Cells were subsequently treated as in B to reveal TEM8 phosphorylation. Total cell extracts were analyzed to follow PA and to confirm RNAi efficiency by Western blotting against *src*. Tubulin was used as an equal loading marker.

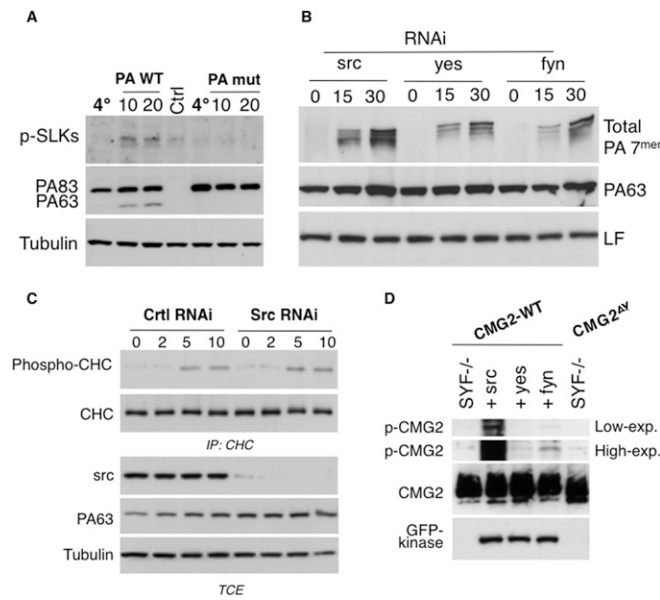

**Fig. 52.** (A) HeLa cells were treated with 500 ng/ml of WT PA83 or PA SNKE, deficient in furin cleavage, for 1 h at 4 °C and incubated for the indicated time at 37 °C. Cell extracts (40 μg of proteins) were analyzed by SDS-PAGE and western blotting to reveal phosphotyrosine src-like kinases (Tyr-416), and PA. (B) HeLa cells were transfected 72 h with siRNAs against *src*, *yes* or *fyn*. Cells were incubated with 500 ng/ml PA63 and 50 ng/ml LF for 1 h at 4 °C and different times at 37 °C and cell extracts were treated 10 min at room temperature with acid buffer and analyzed by SDS-PAGE and western blotting to reveal all PA heptamers (at the surface and intracellular). These samples correspond to the same as those analyzed in Fig. 4B. (C) HeLa cells were transfected for 72 h with siRNAs against *src* or an irrelevant RNAi. Cells were incubated with 500 ng/ml PA63 for 1 h at 4 °C and different times at 37 °C. Immunoprecipitation against CHC were performed and samples were analyzed by SDS-PAGE and Western blotting against phospho-CHC, CHC. Total cell extracts were also analyzed and blotted for *src*, PA and tubulin, as an equal loading marker. (D) SYF-MEF cells were transfected or not 48 h with *src*-GFP, *fyn*-GFP or *yes*-GFP, as well as with CMG2-WT-HA or CMG2 ΔY-HA mutated on 4 tyrosines : Y380A, Y381A, Y445A, Y463A. Cell were then treated with 500 ng/ml of PA63 for 1 h at 4 °C and 20 min at 37 °C. Immunoprecipitates against HA were analyzed by SDS-PAGE and western blotting against phospho-tyrosine proteins, CMG2-HA and GFP.
